# Supplementary material
Source: Elsevier journal article supplement (https://comptes-rendus.academie-sciences.fr/chimie/article/10.1016/j.crci.2010.01.016/file/attach/mmc1.pdf)
Supplement: mmc1 [file mmc1.pdf]

## Supporting information to accompany, Uranium(VI) Bis(imido) Bis(Sulfonamide) and Dihalide Complexes: Synthesis and Density Functional Theory Analysis

Liam P. Spencer,<sup>†</sup> Ping Yang,<sup>‡</sup> Brian L. Scott,<sup>†</sup> Enrique R. Batista,<sup>‡</sup> James M. Boncella<sup>†\*</sup>

<sup>†</sup>*Materials, Physics and Applications Division, Los Alamos National Laboratory, MS J514, Los Alamos NM, 87545;* <sup>‡</sup>*Theoretical Division, Los Alamos National Laboratory, MS B268, Los Alamos NM, 87545*

Email: [boncella@lanl.gov](mailto:boncella@lanl.gov)

### Contents:

|                                                                                                                                    | Page |
|------------------------------------------------------------------------------------------------------------------------------------|------|
| Crystallographic data for $U(N^tBu)_2(\eta^1-N(Me)SO_2Ar')(\eta^3-N(Me)(SO_2Ar')(Me_2bpy))$ ( <b>4</b> )                           | S2   |
| Crystallographic data for <i>trans</i> - $U(N^tBu)_2(Cl)_2(OPPh_3)_2$ ( <b>8</b> )                                                 | S3   |
| Crystallographic data for <i>trans</i> - $U(N^tBu)_2(Br)_2(OPPh_3)_2$ ( <b>9</b> )                                                 | S4   |
| Crystallographic data for $[U(N^tBu)_2(Cl)(\mu-Cl)(Me_2bpy)]_2$ ( <b>10</b> )                                                      | S5   |
| Crystallographic data for $U(N^tBu)_2(Br)_2(Me_2bpy)_2$ ( <b>11</b> )                                                              | S6   |
| Geometry optimization on $U(N^tBu)_2(F)_2(OPPh_3)_2$                                                                               | S7   |
| Geometry optimization on $UO_2F_2(OPPh_3)_2$                                                                                       | S10  |
| Geometry optimization on $U(N^tBu)_2(Cl)_2(OPPh_3)_2$                                                                              | S12  |
| Geometry optimization on $UO_2Cl_2(OPPh_3)_2$                                                                                      | S15  |
| Geometry optimization on $U(N^tBu)_2(Br)_2(OPPh_3)_2$                                                                              | S17  |
| Geometry optimization on $UO_2Br_2(OPPh_3)_2$                                                                                      | S20  |
| Geometry optimization on $U(N^tBu)_2(I)_2(OPPh_3)_2$                                                                               | S22  |
| Geometry optimization on $UO_2I_2(OPPh_3)_2$                                                                                       | S25  |
| Comparison of selected experimental and theoretical U-X (X = halide) metrical parameters in complexes $UO_2^{2+}$ complexes.       | S27  |
| Comparison of selected experimental and theoretical U-X (X = halide) metrical parameters in complexes $U(N^tBu)_2^{2+}$ complexes. | S27  |

**Table 1S.** Crystal data and structure refinement for U(N<sup>t</sup>Bu)<sub>2</sub>(η<sup>1</sup>-N(Me)SO<sub>2</sub>Ar')(η<sup>3</sup>-N(Me)(SO<sub>2</sub>Ar')(Me<sub>2</sub>bpy))-CH<sub>2</sub>Cl<sub>2</sub> (**4**).

|                                   |                                                                                                                  |                 |
|-----------------------------------|------------------------------------------------------------------------------------------------------------------|-----------------|
| Identification code               | apx880s                                                                                                          |                 |
| Empirical formula                 | C <sub>36</sub> H <sub>40</sub> N <sub>6</sub> O <sub>4</sub> S <sub>2</sub> U - CH <sub>2</sub> Cl <sub>2</sub> |                 |
| Formula weight                    | 826.46                                                                                                           |                 |
| Temperature                       | 140(1) K                                                                                                         |                 |
| Wavelength                        | 0.71073 Å                                                                                                        |                 |
| Crystal system                    | Monoclinic                                                                                                       |                 |
| Space group                       | P 2 <sub>1</sub> /c                                                                                              |                 |
| Unit cell dimensions              | a = 11.8477(19) Å                                                                                                | α = 90°.        |
|                                   | b = 13.585(2) Å                                                                                                  | β = 91.082(2)°. |
|                                   | c = 26.019(4) Å                                                                                                  | γ = 90°.        |
| Volume                            | 4187.1(12) Å <sup>3</sup>                                                                                        |                 |
| Z                                 | 6                                                                                                                |                 |
| Density (calculated)              | 1.967 Mg/m <sup>3</sup>                                                                                          |                 |
| Absorption coefficient            | 6.072 mm <sup>-1</sup>                                                                                           |                 |
| F(000)                            | 2444                                                                                                             |                 |
| Crystal size                      | 0.18 x 0.15 x 0.10 mm <sup>3</sup>                                                                               |                 |
| Theta range for data collection   | 1.90 to 25.49°.                                                                                                  |                 |
| Index ranges                      | -14 ≤ h ≤ 14, -16 ≤ k ≤ 16, -31 ≤ l ≤ 31                                                                         |                 |
| Reflections collected             | 37901                                                                                                            |                 |
| Independent reflections           | 7770 [R(int) = 0.1462]                                                                                           |                 |
| Completeness to theta = 25.00°    | 99.9 %                                                                                                           |                 |
| Refinement method                 | Full-matrix least-squares on F <sup>2</sup>                                                                      |                 |
| Data / restraints / parameters    | 7770 / 0 / 454                                                                                                   |                 |
| Goodness-of-fit on F <sup>2</sup> | 0.929                                                                                                            |                 |
| Final R indices [I > 2σ(I)]       | R1 = 0.0590, wR2 = 0.1174                                                                                        |                 |
| R indices (all data)              | R1 = 0.0999, wR2 = 0.1304                                                                                        |                 |
| Largest diff. peak and hole       | 1.780 and -0.871 e.Å <sup>-3</sup>                                                                               |                 |

**Table 2S.** Crystal data and structure refinement for *trans*-U(N<sup>t</sup>Bu)<sub>2</sub>(Cl)<sub>2</sub>(OPPh<sub>3</sub>)<sub>2</sub> (**8**).

|                                   |                                                                                                |                        |
|-----------------------------------|------------------------------------------------------------------------------------------------|------------------------|
| Identification code               | apx574                                                                                         |                        |
| Empirical formula                 | C <sub>42</sub> H <sub>48</sub> Cl <sub>2</sub> N <sub>2</sub> O <sub>2</sub> P <sub>2</sub> U |                        |
| Formula weight                    | 983.69                                                                                         |                        |
| Temperature                       | 141(1) K                                                                                       |                        |
| Wavelength                        | 0.71073 Å                                                                                      |                        |
| Crystal system                    | triclinic                                                                                      |                        |
| Space group                       | P $\bar{1}$                                                                                    |                        |
| Unit cell dimensions              | a = 9.478(2) Å                                                                                 | $\alpha$ = 86.106(3)°. |
|                                   | b = 10.914(3) Å                                                                                | $\beta$ = 75.756(3)°.  |
|                                   | c = 11.358(3) Å                                                                                | $\gamma$ = 69.243(2)°. |
| Volume                            | 1064.6(5) Å <sup>3</sup>                                                                       |                        |
| Z                                 | 1                                                                                              |                        |
| Density (calculated)              | 1.534 Mg/m <sup>3</sup>                                                                        |                        |
| Absorption coefficient            | 4.048 mm <sup>-1</sup>                                                                         |                        |
| F(000)                            | 486                                                                                            |                        |
| Crystal size                      | 0.20 x 0.11 x 0.09 mm <sup>3</sup>                                                             |                        |
| Theta range for data collection   | 2.00 to 28.13°.                                                                                |                        |
| Index ranges                      | -12 ≤ h ≤ 12, -14 ≤ k ≤ 13, -15 ≤ l ≤ 14                                                       |                        |
| Reflections collected             | 11805                                                                                          |                        |
| Independent reflections           | 4773 [R(int) = 0.0423]                                                                         |                        |
| Completeness to theta = 25.00°    | 99.4 %                                                                                         |                        |
| Refinement method                 | Full-matrix least-squares on F <sup>2</sup>                                                    |                        |
| Data / restraints / parameters    | 4773 / 0 / 244                                                                                 |                        |
| Goodness-of-fit on F <sup>2</sup> | 0.679                                                                                          |                        |
| Final R indices [I > 2σ(I)]       | R1 = 0.0382, wR2 = 0.0980                                                                      |                        |
| R indices (all data)              | R1 = 0.0393, wR2 = 0.0997                                                                      |                        |
| Largest diff. peak and hole       | 2.025 and -1.027 e.Å <sup>-3</sup>                                                             |                        |

**Table 3S.** Crystal data and structure refinement for *trans*-U(N<sup>t</sup>Bu)<sub>2</sub>(Br)<sub>2</sub>(OPPh<sub>3</sub>)<sub>2</sub> (**9**).

|                                   |                                                                                                |              |
|-----------------------------------|------------------------------------------------------------------------------------------------|--------------|
| Identification code               | apx486a                                                                                        |              |
| Empirical formula                 | C <sub>44</sub> H <sub>48</sub> Br <sub>2</sub> N <sub>2</sub> O <sub>2</sub> P <sub>2</sub> U |              |
| Formula weight                    | 1096.63                                                                                        |              |
| Temperature                       | 120(1) K                                                                                       |              |
| Wavelength                        | 0.71073 Å                                                                                      |              |
| Crystal system                    | Monoclinic                                                                                     |              |
| Space group                       | P 2 <sub>1</sub> /n                                                                            |              |
| Unit cell dimensions              | a = 11.355(4) Å                                                                                | α = 90°.     |
|                                   | b = 11.018(4) Å                                                                                | β = 108.18°. |
|                                   | c = 18.192(6) Å                                                                                | γ = 90°.     |
| Volume                            | 2162.2(13) Å <sup>3</sup>                                                                      |              |
| Z                                 | 2                                                                                              |              |
| Density (calculated)              | 1.684 Mg/m <sup>3</sup>                                                                        |              |
| Absorption coefficient            | 5.713 mm <sup>-1</sup>                                                                         |              |
| F(000)                            | 1068                                                                                           |              |
| Crystal size                      | 0.20 x 0.14 x 0.10 mm <sup>3</sup>                                                             |              |
| Theta range for data collection   | 2.19 to 28.29°.                                                                                |              |
| Index ranges                      | -14<=h<=14, -13<=k<=14, -24<=l<=23                                                             |              |
| Reflections collected             | 23463                                                                                          |              |
| Independent reflections           | 5047 [R(int) = 0.0648]                                                                         |              |
| Completeness to theta = 25.00°    | 100.0 %                                                                                        |              |
| Absorption correction             | Semi-empirical from equivalents                                                                |              |
| Max. and min. transmission        | 0.5989 and 0.3946                                                                              |              |
| Refinement method                 | Full-matrix least-squares on F <sup>2</sup>                                                    |              |
| Data / restraints / parameters    | 5047 / 5 / 231                                                                                 |              |
| Goodness-of-fit on F <sup>2</sup> | 2.436                                                                                          |              |
| Final R indices [I>2sigma(I)]     | R1 = 0.0858, wR2 = 0.1885                                                                      |              |
| R indices (all data)              | R1 = 0.1035, wR2 = 0.1909                                                                      |              |
| Largest diff. peak and hole       | 2.309 and -4.044 e.Å <sup>-3</sup>                                                             |              |

**Table 4S.** Crystal data and structure refinement for [U(N<sup>t</sup>Bu)<sub>2</sub>(Cl)(μ-Cl)(Me<sub>2</sub>bpy)]<sub>2</sub>-CH<sub>2</sub>Cl<sub>2</sub> (**10**).

|                                   |                                                                                                                 |           |
|-----------------------------------|-----------------------------------------------------------------------------------------------------------------|-----------|
| Identification code               | apx576s                                                                                                         |           |
| Empirical formula                 | C <sub>42</sub> H <sub>64</sub> Cl <sub>8</sub> N <sub>8</sub> U <sub>2</sub> · CH <sub>2</sub> Cl <sub>2</sub> |           |
| Formula weight                    | 1440.67                                                                                                         |           |
| Temperature                       | 141(1) K                                                                                                        |           |
| Wavelength                        | 0.71073 Å                                                                                                       |           |
| Crystal system                    | trigonal                                                                                                        |           |
| Space group                       | P $\bar{3}1c$                                                                                                   |           |
| Unit cell dimensions              | a = 22.3732(16) Å                                                                                               | α = 90°.  |
|                                   | b = 22.3732(16) Å                                                                                               | β = 90°.  |
|                                   | c = 40.327(6) Å                                                                                                 | γ = 120°. |
| Volume                            | 17482(3) Å <sup>3</sup>                                                                                         |           |
| Z                                 | 12                                                                                                              |           |
| Density (calculated)              | 1.642 Mg/m <sup>3</sup>                                                                                         |           |
| Absorption coefficient            | 5.952 mm <sup>-1</sup>                                                                                          |           |
| F(000)                            | 8304                                                                                                            |           |
| Crystal size                      | 0.18 x 0.14 x 0.14 mm <sup>3</sup>                                                                              |           |
| Theta range for data collection   | 1.82 to 25.26°.                                                                                                 |           |
| Index ranges                      | -26 ≤ h ≤ 26, -26 ≤ k ≤ 26, -48 ≤ l ≤ 48                                                                        |           |
| Reflections collected             | 165193                                                                                                          |           |
| Independent reflections           | 10550 [R(int) = 0.1201]                                                                                         |           |
| Completeness to theta = 25.00°    | 100.0 %                                                                                                         |           |
| Max. and min. transmission        | 0.4896 and 0.4138                                                                                               |           |
| Refinement method                 | Full-matrix least-squares on F <sup>2</sup>                                                                     |           |
| Data / restraints / parameters    | 10550 / 0 / 503                                                                                                 |           |
| Goodness-of-fit on F <sup>2</sup> | 1.184                                                                                                           |           |
| Final R indices [I > 2σ(I)]       | R1 = 0.0470, wR2 = 0.1034                                                                                       |           |
| R indices (all data)              | R1 = 0.0740, wR2 = 0.1109                                                                                       |           |
| Largest diff. peak and hole       | 0.993 and -5.440 e.Å <sup>-3</sup>                                                                              |           |

**Table 5S.** Crystal data and structure refinement for  $U(N^tBu)_2(Br)_2(Me_2bpy)_2$  (**11**).

|                                   |                                                              |                                |
|-----------------------------------|--------------------------------------------------------------|--------------------------------|
| Identification code               | apx975                                                       |                                |
| Empirical formula                 | $C_{20} H_{30} Br_2 N_4 U$                                   |                                |
| Formula weight                    | 724.33                                                       |                                |
| Temperature                       | 141(2) K                                                     |                                |
| Wavelength                        | 0.71073 Å                                                    |                                |
| Crystal system                    | monoclinic                                                   |                                |
| Space group                       | $P 2_1/c$                                                    |                                |
| Unit cell dimensions              | $a = 16.7594(17)$ Å                                          | $\alpha = 90^\circ$ .          |
|                                   | $b = 9.4974(9)$ Å                                            | $\beta = 112.1060(10)^\circ$ . |
|                                   | $c = 16.9780(17)$ Å                                          | $\gamma = 90^\circ$ .          |
| Volume                            | 2503.7(4) Å <sup>3</sup>                                     |                                |
| Z                                 | 4                                                            |                                |
| Density (calculated)              | 1.922 Mg/m <sup>3</sup>                                      |                                |
| Absorption coefficient            | 9.686 mm <sup>-1</sup>                                       |                                |
| F(000)                            | 1360                                                         |                                |
| Crystal size                      | 0.30 x 0.12 x 0.10 mm <sup>3</sup>                           |                                |
| Theta range for data collection   | 2.42 to 28.42°.                                              |                                |
| Index ranges                      | $-21 \leq h \leq 21, -12 \leq k \leq 12, -22 \leq l \leq 21$ |                                |
| Reflections collected             | 27617                                                        |                                |
| Independent reflections           | 5975 [R(int) = 0.0872]                                       |                                |
| Completeness to theta = 25.00°    | 100.0 %                                                      |                                |
| Max. and min. transmission        | 0.4442 and 0.1592                                            |                                |
| Refinement method                 | Full-matrix least-squares on F <sup>2</sup>                  |                                |
| Data / restraints / parameters    | 5975 / 0 / 252                                               |                                |
| Goodness-of-fit on F <sup>2</sup> | 0.754                                                        |                                |
| Final R indices [I > 2sigma(I)]   | R1 = 0.0263, wR2 = 0.0606                                    |                                |
| R indices (all data)              | R1 = 0.0357, wR2 = 0.0636                                    |                                |
| Largest diff. peak and hole       | 1.843 and -1.093 e.Å <sup>-3</sup>                           |                                |

**Table 6S.** Geometry Optimization for U(N<sup>t</sup>Bu)<sub>2</sub> (F)<sub>2</sub>(OPPh<sub>3</sub>)<sub>2</sub>.

|   |           |           |           |
|---|-----------|-----------|-----------|
| U | 0.000003  | 0.000020  | -0.000091 |
| F | 0.032764  | -0.101557 | 2.195033  |
| P | 3.801331  | -0.088487 | -0.006901 |
| O | 2.366188  | -0.603948 | -0.049714 |
| N | 0.395080  | 1.834963  | 0.037557  |
| C | 0.258596  | 3.286288  | -0.087092 |
| C | -0.379254 | 3.840447  | 1.203060  |
| H | -1.365491 | 3.391722  | 1.363584  |
| H | -0.495707 | 4.930995  | 1.144805  |
| H | 0.243376  | 3.601779  | 2.071488  |
| C | -0.630663 | 3.615174  | -1.303504 |
| H | -0.202635 | 3.187374  | -2.215813 |
| H | -0.724082 | 4.701660  | -1.434106 |
| H | -1.631888 | 3.192426  | -1.172507 |
| C | 1.655415  | 3.908288  | -0.282046 |
| H | 2.302883  | 3.679996  | 0.570282  |
| H | 1.581602  | 4.999597  | -0.378608 |
| H | 2.129137  | 3.515079  | -1.188026 |
| C | 4.030836  | 1.206086  | 1.252086  |
| C | 3.163319  | 1.210297  | 2.356820  |
| H | 2.345444  | 0.498390  | 2.425090  |
| C | 3.326315  | 2.170433  | 3.356866  |
| H | 2.645857  | 2.176239  | 4.203348  |
| C | 4.344407  | 3.121884  | 3.264006  |
| H | 4.463576  | 3.868697  | 4.044587  |
| C | 5.202015  | 3.124332  | 2.161086  |
| H | 5.984850  | 3.873240  | 2.077812  |
| C | 5.044184  | 2.171777  | 1.153874  |
| H | 5.696196  | 2.195937  | 0.285744  |
| C | 4.314870  | 0.546623  | -1.634957 |
| C | 3.317516  | 0.914881  | -2.552538 |
| H | 2.266102  | 0.795675  | -2.306665 |
| C | 3.683773  | 1.410976  | -3.805669 |
| H | 2.908480  | 1.687424  | -4.514306 |
| C | 5.030687  | 1.542335  | -4.148005 |
| H | 5.308366  | 1.928910  | -5.125080 |
| C | 6.024033  | 1.163037  | -3.241305 |
| H | 7.073032  | 1.247432  | -3.511791 |
| C | 5.668937  | 0.659107  | -1.990348 |
| H | 6.446225  | 0.336211  | -1.302606 |
| C | 4.939294  | -1.453776 | 0.407468  |
| C | 4.677781  | -2.716351 | -0.149716 |
| H | 3.807279  | -2.855257 | -0.783927 |
| C | 5.521756  | -3.790700 | 0.126980  |

|   |           |           |           |
|---|-----------|-----------|-----------|
| H | 5.310117  | -4.766300 | -0.301495 |
| C | 6.632631  | -3.614030 | 0.956424  |
| H | 7.288342  | -4.453358 | 1.172005  |
| C | 6.895408  | -2.362323 | 1.514794  |
| H | 7.752282  | -2.224785 | 2.168557  |
| C | 6.050097  | -1.283791 | 1.245400  |
| H | 6.248601  | -0.317546 | 1.699090  |
| F | -0.033003 | 0.101661  | -2.195195 |
| P | -3.801333 | 0.088465  | 0.006959  |
| O | -2.366194 | 0.603962  | 0.049507  |
| N | -0.394942 | -1.834943 | -0.037726 |
| C | -0.258514 | -3.286282 | 0.086774  |
| C | 0.379537  | -3.840314 | -1.203332 |
| H | 1.365805  | -3.391584 | -1.363650 |
| H | 0.495969  | -4.930869 | -1.145171 |
| H | -0.242951 | -3.601550 | -2.071835 |
| C | 0.630543  | -3.615309 | 1.303298  |
| H | 0.202364  | -3.187602 | 2.215581  |
| H | 0.723929  | -4.701809 | 1.433803  |
| H | 1.631793  | -3.192558 | 1.172510  |
| C | -1.655375 | -3.908278 | 0.281441  |
| H | -2.302700 | -3.679892 | -0.570969 |
| H | -1.581593 | -4.999597 | 0.377908  |
| H | -2.129234 | -3.515147 | 1.187383  |
| C | -4.030998 | -1.206030 | -1.252081 |
| C | -3.163604 | -1.210145 | -2.356914 |
| H | -2.345740 | -0.498227 | -2.425206 |
| C | -3.326702 | -2.170202 | -3.357018 |
| H | -2.646339 | -2.175936 | -4.203577 |
| C | -4.344776 | -3.121670 | -3.264120 |
| H | -4.464026 | -3.868421 | -4.044749 |
| C | -5.202256 | -3.124218 | -2.161101 |
| H | -5.985071 | -3.873143 | -2.077796 |
| C | -5.044322 | -2.171741 | -1.153829 |
| H | -5.696230 | -2.195986 | -0.285625 |
| C | -4.314628 | -0.546744 | 1.635055  |
| C | -3.317165 | -0.914890 | 2.552560  |
| H | -2.265778 | -0.795537 | 2.306638  |
| C | -3.683279 | -1.411056 | 3.805707  |
| H | -2.907901 | -1.687416 | 4.514285  |
| C | -5.030152 | -1.542594 | 4.148133  |
| H | -5.307716 | -1.929224 | 5.125219  |
| C | -6.023608 | -1.163398 | 3.241509  |
| H | -7.072578 | -1.247927 | 3.512065  |
| C | -5.668659 | -0.659399 | 1.990540  |
| H | -6.446035 | -0.336578 | 1.302864  |



|   |           |          |           |
|---|-----------|----------|-----------|
| C | -4.939389 | 1.453757 | -0.407152 |
| C | -4.677718 | 2.716342 | 0.149935  |
| H | -3.807051 | 2.855252 | 0.783917  |
| C | -5.521755 | 3.790693 | -0.126569 |
| H | -5.309994 | 4.766300 | 0.301829  |
| C | -6.632846 | 3.614016 | -0.955721 |
| H | -7.288603 | 4.453347 | -1.171152 |
| C | -6.895780 | 2.362298 | -1.513995 |
| H | -7.752823 | 2.224754 | -2.167536 |
| C | -6.050409 | 1.283765 | -1.244795 |
| H | -6.249038 | 0.317513 | -1.698417 |

**Table 7S.** Geometry Optimization for  $\text{UO}_2\text{F}_2(\text{OPPh}_3)_2$ .

|   |             |             |             |
|---|-------------|-------------|-------------|
| U | -0.00000200 | 0.00001300  | -0.00001400 |
| F | -0.06438000 | 2.16723100  | -0.04170400 |
| P | -3.78117400 | -0.01075900 | -0.05577800 |
| O | -2.33854100 | -0.05154400 | -0.56137500 |
| C | -3.99805800 | 1.15741000  | 1.32020200  |
| C | -3.16194800 | 2.28489200  | 1.37350000  |
| H | -2.37084000 | 2.42544300  | 0.64254600  |
| C | -3.32311200 | 3.21401300  | 2.40149500  |
| H | -2.66485800 | 4.07653500  | 2.44702800  |
| C | -4.31182100 | 3.02993900  | 3.37039800  |
| H | -4.43004500 | 3.75586800  | 4.17050400  |
| C | -5.13988900 | 1.90634500  | 3.32228000  |
| H | -5.89915600 | 1.75280700  | 4.08418000  |
| C | -4.98162700 | 0.96694000  | 2.30296900  |
| H | -5.60912300 | 0.08057000  | 2.28571700  |
| C | -4.32587900 | -1.66127800 | 0.48320500  |
| C | -3.35749600 | -2.55779500 | 0.96390500  |
| H | -2.30777300 | -2.28200300 | 0.98083600  |
| C | -3.74621300 | -3.82584400 | 1.39810800  |
| H | -2.99217300 | -4.51778500 | 1.76151400  |
| C | -5.08973900 | -4.20403500 | 1.35897400  |
| H | -5.38580400 | -5.19341800 | 1.69741100  |
| C | -6.05360000 | -3.31644900 | 0.87447900  |
| H | -7.09784000 | -3.61337400 | 0.82991200  |
| C | -5.67408000 | -2.04925100 | 0.43158700  |
| H | -6.42427500 | -1.37324700 | 0.03077400  |
| C | -4.87297400 | 0.52057500  | -1.41354600 |
| C | -4.48760700 | 0.20314900  | -2.72561800 |
| H | -3.54880200 | -0.31413300 | -2.89886300 |
| C | -5.29868800 | 0.57482500  | -3.79749200 |
| H | -4.99358200 | 0.33397400  | -4.81187100 |
| C | -6.49445000 | 1.26000900  | -3.56812000 |
| H | -7.12305500 | 1.55026900  | -4.40567100 |
| C | -6.87779800 | 1.58278700  | -2.26472600 |
| H | -7.80059400 | 2.12762900  | -2.08571300 |
| C | -6.06796600 | 1.21894800  | -1.18764600 |
| H | -6.35772700 | 1.49460100  | -0.17771700 |
| F | 0.06437600  | -2.16720500 | 0.04167400  |
| P | 3.78117200  | 0.01075500  | 0.05577800  |
| O | 2.33853400  | 0.05155700  | 0.56135800  |
| C | 3.99805900  | -1.15740000 | -1.32021200 |
| C | 3.16194600  | -2.28487900 | -1.37352400 |
| H | 2.37083500  | -2.42543500 | -0.64257600 |
| C | 3.32311200  | -3.21399100 | -2.40152700 |

|   |             |             |             |
|---|-------------|-------------|-------------|
| H | 2.66485700  | -4.07651000 | -2.44707100 |
| C | 4.31182700  | -3.02991100 | -3.37042400 |
| H | 4.43005300  | -3.75583300 | -4.17053600 |
| C | 5.13989700  | -1.90631900 | -3.32229100 |
| H | 5.89916900  | -1.75277600 | -4.08418600 |
| C | 4.98163300  | -0.96692400 | -2.30297200 |
| H | 5.60913300  | -0.08055600 | -2.28570800 |
| C | 4.32590600  | 1.66127400  | -0.48317800 |
| C | 3.35754100  | 2.55781100  | -0.96387300 |
| H | 2.30781400  | 2.28203500  | -0.98081500 |
| C | 3.74628000  | 3.82586100  | -1.39805500 |
| H | 2.99225300  | 4.51781800  | -1.76145700 |
| C | 5.08981100  | 4.20403100  | -1.35890500 |
| H | 5.38589300  | 5.19341500  | -1.69732600 |
| C | 6.05365400  | 3.31642500  | -0.87441500 |
| H | 7.09789900  | 3.61333400  | -0.82983500 |
| C | 5.67411300  | 2.04922600  | -0.43154400 |
| H | 6.42429400  | 1.37320500  | -0.03073500 |
| C | 4.87294800  | -0.52060800 | 1.41355400  |
| C | 4.48757300  | -0.20318200 | 2.72562400  |
| H | 3.54877700  | 0.31411600  | 2.89886300  |
| C | 5.29863700  | -0.57488100 | 3.79750400  |
| H | 4.99352600  | -0.33402900 | 4.81188200  |
| C | 6.49438800  | -1.26008500 | 3.56814000  |
| H | 7.12298000  | -1.55036300 | 4.40569600  |
| C | 6.87774300  | -1.58286400 | 2.26474800  |
| H | 7.80053100  | -2.12772100 | 2.08574100  |
| C | 6.06792900  | -1.21900300 | 1.18766200  |
| H | 6.35769400  | -1.49465500 | 0.17773500  |
| O | -0.45675100 | 0.00470000  | 1.73380500  |
| O | 0.45674600  | -0.00467600 | -1.73383100 |

**Table 8S.** Geometry Optimization for  $U(N^tBu)_2(Cl)_2(OPPh_3)_2$ .

|    |           |           |           |
|----|-----------|-----------|-----------|
| U  | 0.000067  | -0.000237 | 0.000448  |
| Cl | -0.074540 | 0.090569  | 2.750195  |
| P  | -3.877376 | 0.044749  | -0.015407 |
| O  | -2.387922 | 0.368525  | -0.088659 |
| N  | -0.236411 | -1.832735 | 0.012889  |
| C  | -0.207328 | -3.295125 | -0.093621 |
| C  | 0.268844  | -3.875082 | 1.251465  |
| H  | 1.276639  | -3.517982 | 1.488320  |
| H  | 0.287356  | -4.971916 | 1.211880  |
| H  | -0.395540 | -3.563077 | 2.063041  |
| C  | 0.753284  | -3.699071 | -1.228285 |
| H  | 0.446235  | -3.238972 | -2.172176 |
| H  | 0.760668  | -4.790045 | -1.350162 |
| H  | 1.773507  | -3.368539 | -1.009155 |
| C  | -1.628598 | -3.798556 | -0.410182 |
| H  | -2.326653 | -3.517172 | 0.384208  |
| H  | -1.633471 | -4.892067 | -0.503365 |
| H  | -1.986094 | -3.372249 | -1.353475 |
| C  | -4.230318 | -1.278112 | 1.183337  |
| C  | -3.463570 | -1.306332 | 2.360840  |
| H  | -2.665831 | -0.586211 | 2.523059  |
| C  | -3.698763 | -2.296155 | 3.315621  |
| H  | -3.092949 | -2.318269 | 4.216746  |
| C  | -4.693518 | -3.254333 | 3.106832  |
| H  | -4.871004 | -4.025265 | 3.852094  |
| C  | -5.453799 | -3.230374 | 1.935283  |
| H  | -6.219429 | -3.982217 | 1.764520  |
| C  | -5.222676 | -2.247514 | 0.971772  |
| H  | -5.802028 | -2.249066 | 0.053796  |
| C  | -4.521659 | -0.424538 | -1.650289 |
| C  | -3.611897 | -0.794592 | -2.652214 |
| H  | -2.542317 | -0.767866 | -2.465565 |
| C  | -4.085966 | -1.159786 | -3.914200 |
| H  | -3.374941 | -1.433940 | -4.688031 |
| C  | -5.455940 | -1.160743 | -4.180028 |
| H  | -5.819060 | -1.446053 | -5.163867 |
| C  | -6.363213 | -0.779662 | -3.186974 |
| H  | -7.429114 | -0.762586 | -3.397189 |
| C  | -5.899091 | -0.403853 | -1.927102 |
| H  | -6.606930 | -0.078530 | -1.169073 |
| C  | -4.825604 | 1.511854  | 0.509047  |
| C  | -4.516827 | 2.744926  | -0.089484 |
| H  | -3.718372 | 2.804238  | -0.823362 |
| C  | -5.224168 | 3.891384  | 0.267367  |

|    |           |           |           |
|----|-----------|-----------|-----------|
| H  | -4.976596 | 4.843051  | -0.194230 |
| C  | -6.245611 | 3.816601  | 1.218902  |
| H  | -6.794735 | 4.712146  | 1.496912  |
| C  | -6.556800 | 2.594397  | 1.815730  |
| H  | -7.345336 | 2.535333  | 2.560809  |
| C  | -5.848140 | 1.442932  | 1.464988  |
| H  | -6.085260 | 0.497122  | 1.942113  |
| Cl | 0.075879  | -0.091565 | -2.749245 |
| P  | 3.877393  | -0.044407 | 0.015113  |
| O  | 2.388065  | -0.368338 | 0.090234  |
| N  | 0.235854  | 1.832314  | -0.011963 |
| C  | 0.206590  | 3.294559  | 0.096478  |
| C  | -0.266199 | 3.876189  | -1.249080 |
| H  | -1.273357 | 3.519300  | -1.488915 |
| H  | -0.284894 | 4.972975  | -1.208195 |
| H  | 0.400312  | 3.565243  | -2.059323 |
| C  | -0.756913 | 3.697047  | 1.229205  |
| H  | -0.452075 | 3.235951  | 2.173330  |
| H  | -0.764785 | 4.787883  | 1.352288  |
| H  | -1.776531 | 3.366600  | 1.007137  |
| C  | 1.627061  | 3.797514  | 0.417294  |
| H  | 2.327070  | 3.517351  | -0.375804 |
| H  | 1.631678  | 4.890883  | 0.512134  |
| H  | 1.982185  | 3.369746  | 1.360812  |
| C  | 4.228872  | 1.280358  | -1.181943 |
| C  | 3.463272  | 1.308118  | -2.360224 |
| H  | 2.667273  | 0.586423  | -2.524009 |
| C  | 3.697194  | 2.299491  | -3.313689 |
| H  | 3.092252  | 2.321231  | -4.215409 |
| C  | 4.689561  | 3.259704  | -3.102834 |
| H  | 4.866059  | 4.031840  | -3.847083 |
| C  | 5.448699  | 3.236192  | -1.930552 |
| H  | 6.212457  | 3.989573  | -1.758200 |
| C  | 5.218826  | 2.251763  | -0.968327 |
| H  | 5.797292  | 2.253592  | -0.049799 |
| C  | 4.523756  | 0.422287  | 1.649913  |
| C  | 3.615134  | 0.789724  | 2.653837  |
| H  | 2.545313  | 0.762780  | 2.468535  |
| C  | 4.090743  | 1.152770  | 3.915869  |
| H  | 3.380640  | 1.425002  | 4.691226  |
| C  | 5.461090  | 1.154135  | 4.179768  |
| H  | 5.825403  | 1.437763  | 5.163653  |
| C  | 6.367230  | 0.775664  | 3.184680  |
| H  | 7.433439  | 0.758942  | 3.393355  |
| C  | 5.901591  | 0.402033  | 1.924724  |
| H  | 6.608587  | 0.078767  | 1.165028  |

|   |          |           |           |
|---|----------|-----------|-----------|
| C | 4.824884 | -1.510597 | -0.513140 |
| C | 4.514615 | -2.745332 | 0.081119  |
| H | 3.715161 | -2.806409 | 0.813748  |
| C | 5.221763 | -3.891084 | -0.278412 |
| H | 4.973017 | -4.844053 | 0.179853  |
| C | 6.244498 | -3.813907 | -1.228351 |
| H | 6.793458 | -4.708894 | -1.508471 |
| C | 6.557206 | -2.590003 | -1.820913 |
| H | 7.346757 | -2.529067 | -2.564765 |
| C | 5.848740 | -1.439245 | -1.467501 |
| H | 6.086974 | -0.492086 | -1.941399 |

**Table 9S.** Geometry Optimization for  $\text{UO}_2\text{Cl}_2(\text{OPPh}_3)_2$ .

|    |             |             |             |
|----|-------------|-------------|-------------|
| U  | -0.00018200 | -0.00007800 | -0.00058400 |
| Cl | -0.19018700 | 2.68646700  | 0.02891300  |
| P  | -3.84585200 | -0.03152800 | -0.02656900 |
| O  | -2.33564200 | -0.13880500 | -0.24571700 |
| O  | -0.17546700 | -0.02683000 | 1.76709600  |
| C  | -4.24588300 | 0.67056200  | 1.59995900  |
| C  | -3.45373700 | 1.73178500  | 2.07215200  |
| H  | -2.61092300 | 2.09637700  | 1.49086300  |
| C  | -3.73953000 | 2.30790700  | 3.30927600  |
| H  | -3.11879400 | 3.12064200  | 3.67463600  |
| C  | -4.80987000 | 1.83832800  | 4.07476300  |
| H  | -5.02668700 | 2.29002800  | 5.03908300  |
| C  | -5.59617900 | 0.78317700  | 3.60820300  |
| H  | -6.42183300 | 0.40922900  | 4.20726100  |
| C  | -5.31433800 | 0.19450900  | 2.37449200  |
| H  | -5.91515400 | -0.63987800 | 2.02540900  |
| C  | -4.59680900 | -1.68071300 | -0.16474500 |
| C  | -3.78424100 | -2.79637300 | 0.09435000  |
| H  | -2.73387300 | -2.66570700 | 0.33782500  |
| C  | -4.32614600 | -4.07948500 | 0.00840800  |
| H  | -3.69163700 | -4.93949800 | 0.20131800  |
| C  | -5.66912300 | -4.25510200 | -0.33119000 |
| H  | -6.08562400 | -5.25653400 | -0.39896800 |
| C  | -6.47674100 | -3.14627200 | -0.59676300 |
| H  | -7.51826500 | -3.28210000 | -0.87461200 |
| C  | -5.94291600 | -1.85991200 | -0.51998900 |
| H  | -6.56938100 | -1.00367100 | -0.75390500 |
| C  | -4.56754800 | 1.05099700  | -1.29461800 |
| C  | -3.87967400 | 1.19795800  | -2.50910300 |
| H  | -2.92554500 | 0.70037200  | -2.65332700 |
| C  | -4.41377000 | 2.00586100  | -3.51311600 |
| H  | -3.87419800 | 2.12705800  | -4.44785900 |
| C  | -5.63022200 | 2.66253100  | -3.31360400 |
| H  | -6.04156500 | 3.29252600  | -4.09761100 |
| C  | -6.31303200 | 2.52321000  | -2.10293300 |
| H  | -7.25105900 | 3.04692900  | -1.94134000 |
| C  | -5.78176700 | 1.72393600  | -1.09054800 |
| H  | -6.29986700 | 1.64309300  | -0.13883600 |
| Cl | 0.18974500  | -2.68666000 | -0.03010500 |
| P  | 3.84583100  | 0.03138300  | 0.02648600  |
| O  | 2.33539900  | 0.13827700  | 0.24409600  |
| O  | 0.17504100  | 0.02689200  | -1.76825200 |
| C  | 4.24734000  | -0.67180300 | -1.59923600 |
| C  | 3.45455500  | -1.73209600 | -2.07234400 |

|   |            |             |             |
|---|------------|-------------|-------------|
| H | 2.61036100 | -2.09541500 | -1.49226800 |
| C | 3.74159300 | -2.30905900 | -3.30881200 |
| H | 3.12035700 | -3.12109900 | -3.67486600 |
| C | 4.81379200 | -1.84119300 | -4.07272500 |
| H | 5.03157800 | -2.29352200 | -5.03653200 |
| C | 5.60074200 | -0.78690500 | -3.60525300 |
| H | 6.42786600 | -0.41426600 | -4.20310000 |
| C | 5.31767100 | -0.19741500 | -2.37222600 |
| H | 5.91897100 | 0.63637200  | -2.02255100 |
| C | 4.59640000 | 1.68083900  | 0.16387300  |
| C | 3.78420200 | 2.79619400  | -0.09775200 |
| H | 2.73417200 | 2.66537200  | -0.34259200 |
| C | 4.32598200 | 4.07940000  | -0.01257500 |
| H | 3.69176200 | 4.93918400  | -0.20744300 |
| C | 5.66846600 | 4.25545400  | 0.32878100  |
| H | 6.08485400 | 5.25697400  | 0.39594500  |
| C | 6.47567900 | 3.14696300  | 0.59690600  |
| H | 7.51678300 | 3.28312000  | 0.87616700  |
| C | 5.94196000 | 1.86050100  | 0.52091500  |
| H | 6.56808300 | 1.00456700  | 0.75683900  |
| C | 4.56674900 | -1.04984300 | 1.29607700  |
| C | 3.87776700 | -1.19612000 | 2.51000500  |
| H | 2.92331600 | -0.69878700 | 2.65295100  |
| C | 4.41124600 | -2.00302100 | 3.51516600  |
| H | 3.87083500 | -2.12369400 | 4.44949300  |
| C | 5.62814500 | -2.65935300 | 3.31732800  |
| H | 6.03900600 | -3.28855400 | 4.10222400  |
| C | 6.31205600 | -2.52072200 | 2.10718800  |
| H | 7.25044300 | -3.04420400 | 1.94692400  |
| C | 5.78143800 | -1.72245700 | 1.09367900  |
| H | 6.30038100 | -1.64217800 | 0.14238000  |



**Table 10S.** Geometry Optimization for U(N<sup>t</sup>Bu)<sub>2</sub>(Br)<sub>2</sub>(OPPh<sub>3</sub>)<sub>2</sub>.

|    |           |           |           |
|----|-----------|-----------|-----------|
| U  | -0.000020 | -0.000270 | 0.001721  |
| Br | 0.023257  | 0.876398  | -2.802973 |
| N  | -0.000015 | -1.760888 | -0.544588 |
| C  | -1.523360 | -3.599079 | -1.095154 |
| H  | -2.001849 | -3.017033 | -1.891403 |
| H  | -2.085442 | -3.443037 | -0.168112 |
| H  | -1.585757 | -4.661676 | -1.362620 |
| C  | -0.050858 | -3.178723 | -0.919739 |
| C  | 0.603729  | -4.018356 | 0.195253  |
| H  | 1.659587  | -3.748253 | 0.308672  |
| H  | 0.545877  | -5.086814 | -0.050054 |
| H  | 0.104434  | -3.847859 | 1.154703  |
| P  | 3.926608  | 0.033712  | 0.013545  |
| O  | 2.402915  | 0.020216  | 0.014784  |
| C  | 4.154851  | 0.400429  | 4.073251  |
| H  | 3.457753  | 0.608484  | 4.879615  |
| C  | 4.530611  | 1.481710  | -0.912274 |
| C  | 5.923509  | -0.201385 | 1.994174  |
| H  | 6.609093  | -0.473830 | 1.195904  |
| C  | 3.686620  | 0.359078  | 2.758536  |
| H  | 2.631682  | 0.510206  | 2.553228  |
| C  | 4.573563  | 0.068725  | 1.711750  |
| C  | 5.501802  | 0.159598  | 4.347478  |
| H  | 5.862178  | 0.192373  | 5.372315  |
| C  | 5.747219  | 2.117595  | -0.620280 |
| H  | 6.362690  | 1.776729  | 0.206344  |
| C  | 6.161793  | 3.211299  | -1.379766 |
| H  | 7.101152  | 3.704389  | -1.144732 |
| C  | 6.385794  | -0.144679 | 3.308109  |
| H  | 7.430645  | -0.352734 | 3.521973  |
| C  | 3.731028  | 1.956551  | -1.964996 |
| H  | 2.773124  | 1.491756  | -2.184257 |
| C  | 4.154218  | 3.051292  | -2.721019 |
| H  | 3.525405  | 3.414222  | -3.528968 |
| C  | 4.634199  | -1.453759 | -0.769040 |
| C  | 4.543396  | -2.681219 | -0.090107 |
| H  | 4.093821  | -2.724157 | 0.898114  |
| C  | 5.027396  | -3.846590 | -0.681725 |
| H  | 4.951719  | -4.791981 | -0.151874 |
| C  | 5.214965  | -1.412304 | -2.044988 |
| H  | 5.285930  | -0.470596 | -2.579752 |
| C  | 5.606522  | -3.797292 | -1.952762 |
| H  | 5.984861  | -4.706712 | -2.411983 |
| C  | 5.698280  | -2.582170 | -2.633142 |

|    |           |           |           |
|----|-----------|-----------|-----------|
| H  | 6.144573  | -2.542531 | -3.622954 |
| C  | 5.367695  | 3.677275  | -2.430627 |
| H  | 5.691747  | 4.533256  | -3.016850 |
| C  | 0.713061  | -3.362191 | -2.245695 |
| H  | 0.251903  | -2.773081 | -3.045842 |
| H  | 0.712247  | -4.419224 | -2.543323 |
| H  | 1.752331  | -3.033319 | -2.139073 |
| Br | -0.023383 | -0.876874 | 2.806799  |
| N  | -0.000288 | 1.760063  | 0.548796  |
| C  | 1.521994  | 3.602831  | 1.086802  |
| H  | 2.009924  | 3.021292  | 1.877713  |
| H  | 2.075853  | 3.449972  | 0.154332  |
| H  | 1.583307  | 4.665289  | 1.355091  |
| C  | 0.049332  | 3.177717  | 0.924750  |
| C  | -0.618735 | 4.016250  | -0.183033 |
| H  | -1.674646 | 3.742526  | -0.286772 |
| H  | -0.562354 | 5.084626  | 0.062967  |
| H  | -0.127876 | 3.848592  | -1.147340 |
| P  | -3.926512 | -0.033510 | -0.014435 |
| O  | -2.402807 | -0.020270 | -0.013209 |
| C  | -4.144498 | -0.459572 | -4.068819 |
| H  | -3.445240 | -0.678840 | -4.870328 |
| C  | -4.532604 | -1.467534 | 0.931509  |
| C  | -5.918828 | 0.171477  | -2.003266 |
| H  | -6.606626 | 0.455168  | -1.210841 |
| C  | -3.679692 | -0.398683 | -2.753654 |
| H  | -2.625182 | -0.545766 | -2.543326 |
| C  | -4.569491 | -0.093780 | -1.713447 |
| C  | -5.490902 | -0.223710 | -4.349963 |
| H  | -5.848625 | -0.271675 | -5.375129 |
| C  | -5.748768 | -2.107409 | 0.646470  |
| H  | -6.362537 | -1.778501 | -0.186241 |
| C  | -6.165035 | -3.189790 | 1.421087  |
| H  | -7.104068 | -3.686071 | 1.191524  |
| C  | -6.377706 | 0.095234  | -3.317417 |
| H  | -7.422117 | 0.299521  | -3.536982 |
| C  | -3.735040 | -1.927132 | 1.992458  |
| H  | -2.777263 | -1.459652 | 2.206454  |
| C  | -4.159826 | -3.010707 | 2.763508  |
| H  | -3.532445 | -3.362064 | 3.577661  |
| C  | -4.635472 | 1.465812  | 0.743997  |
| C  | -4.542437 | 2.682860  | 0.046849  |
| H  | -4.090288 | 2.710749  | -0.940738 |
| C  | -5.027423 | 3.857221  | 0.619570  |
| H  | -4.950004 | 4.794463  | 0.075681  |
| C  | -5.219442 | 1.443863  | 2.018974  |

|   |           |           |          |
|---|-----------|-----------|----------|
| H | -5.292203 | 0.510365  | 2.567706 |
| C | -5.609769 | 3.827357  | 1.889731 |
| H | -5.988887 | 4.743751  | 2.334207 |
| C | -5.703734 | 2.622683  | 2.588159 |
| H | -6.152545 | 2.598175  | 3.577322 |
| C | -5.372943 | -3.640561 | 2.480076 |
| H | -5.698230 | -4.487890 | 3.078068 |
| C | -0.702588 | 3.357188  | 2.258084 |
| H | -0.231900 | 2.768770  | 3.053167 |
| H | -0.702488 | 4.413896  | 2.556860 |
| H | -1.741722 | 3.024952  | 2.160907 |

**Table 11S.** Geometry Optimization for  $\text{UO}_2\text{Br}_2(\text{OPPh}_3)_2$ .

|    |             |             |             |
|----|-------------|-------------|-------------|
| U  | 0.00005200  | -0.00216700 | 0.00048700  |
| Br | 0.28393600  | 2.87201000  | -0.06749400 |
| P  | 3.85127500  | -0.06744100 | 0.00490000  |
| O  | 2.32999900  | -0.23585400 | 0.02979300  |
| C  | 4.41555800  | -4.09948800 | 0.23608300  |
| H  | 3.80525900  | -4.96222000 | 0.48624600  |
| C  | 4.43840100  | 0.82596600  | 1.47308600  |
| C  | 5.96817400  | -1.87574700 | -0.44443400 |
| H  | 6.56826000  | -1.01824400 | -0.73675400 |
| C  | 3.84818800  | -2.82465400 | 0.27700400  |
| H  | 2.80229200  | -2.70122200 | 0.54234300  |
| C  | 4.62836900  | -1.70760200 | -0.05900100 |
| C  | 5.75194600  | -4.26343300 | -0.13226000 |
| H  | 6.18855600  | -5.25806800 | -0.16382800 |
| C  | 5.48570000  | 0.35261600  | 2.27655000  |
| H  | 5.98127400  | -0.58270000 | 2.03610000  |
| C  | 5.88520800  | 1.08092200  | 3.39865600  |
| H  | 6.69494700  | 0.71001500  | 4.02083100  |
| C  | 6.52808700  | -3.15216900 | -0.47386800 |
| H  | 7.56429000  | -3.28030700 | -0.77422400 |
| C  | 3.78694400  | 2.02790400  | 1.80386000  |
| H  | 2.96085200  | 2.39325700  | 1.19832700  |
| C  | 4.18916800  | 2.74403000  | 2.92976400  |
| H  | 3.67714600  | 3.66663500  | 3.18684500  |
| C  | 4.36352100  | 0.87768000  | -1.45834600 |
| C  | 3.55432400  | 0.82542100  | -2.60440100 |
| H  | 2.62292300  | 0.26768300  | -2.59053000 |
| C  | 3.93695800  | 1.51981900  | -3.75194500 |
| H  | 3.30257300  | 1.48815500  | -4.63284800 |
| C  | 5.54643500  | 1.63239800  | -1.46863800 |
| H  | 6.15932800  | 1.70316800  | -0.57426600 |
| C  | 5.12123000  | 2.26013700  | -3.76425500 |
| H  | 5.41285100  | 2.80220400  | -4.65976200 |
| C  | 5.92496000  | 2.31755100  | -2.62338400 |
| H  | 6.83851400  | 2.90553300  | -2.62705700 |
| C  | 5.23821200  | 2.27399800  | 3.72474400  |
| H  | 5.54732700  | 2.83544200  | 4.60238100  |
| Br | -0.28223300 | -2.87654000 | 0.06865400  |
| P  | -3.85155600 | 0.06822100  | -0.00561500 |
| O  | -2.32983800 | 0.23222600  | -0.03087400 |
| C  | -4.40704300 | 4.10046300  | -0.25362100 |
| H  | -3.79540500 | 4.96064200  | -0.50923300 |
| C  | -4.43982200 | -0.82840800 | -1.47138000 |
| C  | -5.96297900 | 1.88348000  | 0.44136800  |

|   |             |             |             |
|---|-------------|-------------|-------------|
| H | -6.56411300 | 1.02873400  | 0.73951400  |
| C | -3.84279900 | 2.82414200  | -0.29032100 |
| H | -2.79793800 | 2.69695700  | -0.55790800 |
| C | -4.62466300 | 1.71047100  | 0.05296300  |
| C | -5.74204800 | 4.26919500  | 0.11762300  |
| H | -6.17622400 | 5.26499400  | 0.14590200  |
| C | -5.49420400 | -0.36201700 | -2.26961600 |
| H | -5.99389600 | 0.57070200  | -2.02750600 |
| C | -5.89518900 | -1.09365200 | -3.38902700 |
| H | -6.71036200 | -0.72814600 | -4.00729400 |
| C | -6.51984300 | 3.16134900  | 0.46643000  |
| H | -7.55489900 | 3.29331600  | 0.76907300  |
| C | -3.78267500 | -2.02651600 | -1.80470600 |
| H | -2.95108700 | -2.38607300 | -1.20323800 |
| C | -4.18648800 | -2.74598700 | -2.92791600 |
| H | -3.67016700 | -3.66562300 | -3.18702100 |
| C | -4.36685300 | -0.87083300 | 1.46050500  |
| C | -3.55870600 | -0.81579700 | 2.60719100  |
| H | -2.62648100 | -0.25945600 | 2.59235300  |
| C | -3.94341700 | -1.50577500 | 3.75669500  |
| H | -3.30988700 | -1.47197000 | 4.63813500  |
| C | -5.55071000 | -1.62403100 | 1.47212600  |
| H | -6.16271600 | -1.69713700 | 0.57734000  |
| C | -5.12870900 | -2.24446000 | 3.77032700  |
| H | -5.42194900 | -2.78307900 | 4.66738400  |
| C | -5.93132400 | -2.30473200 | 2.62883200  |
| H | -6.84562100 | -2.89155200 | 2.63354600  |
| C | -5.24264900 | -2.28304600 | -3.71759800 |
| H | -5.55298900 | -2.84704400 | -4.59316500 |
| O | 0.04323300  | -0.04670300 | -1.77371900 |
| O | -0.04344100 | 0.04238800  | 1.77468000  |

**Table 12S.** Geometry Optimization for U(N<sup>t</sup>Bu)<sub>2</sub>(I)<sub>2</sub>(OPPh<sub>3</sub>)<sub>2</sub>.

|   |           |           |           |
|---|-----------|-----------|-----------|
| U | 0.000100  | 0.002426  | -0.001113 |
| I | 0.038033  | -3.167681 | -0.159204 |
| P | -3.923485 | -0.010831 | -0.049313 |
| O | -2.397955 | 0.002546  | -0.105908 |
| C | -4.590575 | 1.294917  | -1.129512 |
| C | -4.556344 | 0.293869  | 1.633067  |
| C | -4.561888 | -0.754517 | 2.569636  |
| H | -4.251573 | -1.752003 | 2.272876  |
| C | -4.592721 | -1.616537 | -0.574188 |
| C | -5.366404 | 0.762478  | 4.272540  |
| H | -5.680578 | 0.944511  | 5.296688  |
| C | -5.912644 | -1.999934 | -0.279215 |
| H | -6.553308 | -1.354403 | 0.315290  |
| C | -4.957411 | 1.577675  | 2.032066  |
| H | -4.952889 | 2.395829  | 1.318975  |
| C | -3.797341 | 2.431580  | -1.356728 |
| H | -2.803893 | 2.506714  | -0.921919 |
| C | -4.255598 | -3.710446 | -1.743263 |
| H | -3.599787 | -4.381099 | -2.290177 |
| C | -5.553090 | 3.377093  | -2.730254 |
| H | -5.927212 | 4.184861  | -3.353638 |
| C | -5.863295 | 1.203984  | -1.714241 |
| H | -6.475992 | 0.320508  | -1.564310 |
| C | -3.763759 | -2.479964 | -1.304466 |
| H | -2.731167 | -2.209135 | -1.495571 |
| C | -5.571623 | -4.080511 | -1.463542 |
| H | -5.950896 | -5.039731 | -1.805539 |
| C | -4.967008 | -0.518649 | 3.882613  |
| H | -4.968117 | -1.333849 | 4.600554  |
| C | -4.284404 | 3.468590  | -2.154755 |
| H | -3.663938 | 4.343625  | -2.325154 |
| C | -6.399904 | -3.226056 | -0.729940 |
| H | -7.419792 | -3.519727 | -0.497466 |
| C | -5.359670 | 1.808597  | 3.348378  |
| H | -5.666484 | 2.806082  | 3.649644  |
| C | -6.340517 | 2.243708  | -2.511675 |
| H | -7.323548 | 2.165042  | -2.967745 |
| N | -0.054578 | -0.071462 | 1.836379  |
| C | -0.055815 | -0.152006 | 3.304292  |
| C | -0.675788 | -1.496785 | 3.725977  |
| H | -0.135878 | -2.333829 | 3.273503  |
| H | -1.720563 | -1.555171 | 3.405093  |
| H | -0.643138 | -1.601003 | 4.818057  |
| C | 1.398143  | -0.062131 | 3.804516  |

|   |           |           |           |
|---|-----------|-----------|-----------|
| H | 2.001644  | -0.877164 | 3.393096  |
| H | 1.428223  | -0.126742 | 4.899440  |
| H | 1.851647  | 0.888463  | 3.505003  |
| C | -0.881776 | 1.020879  | 3.862888  |
| H | -0.900659 | 0.979672  | 4.959554  |
| H | -1.912367 | 0.976069  | 3.496967  |
| H | -0.452963 | 1.979260  | 3.554659  |
| I | -0.037131 | 3.172567  | 0.156935  |
| P | 3.923711  | 0.008212  | 0.049920  |
| O | 2.398032  | -0.001304 | 0.104391  |
| C | 4.586147  | -1.288660 | 1.143598  |
| C | 4.558297  | -0.314192 | -1.628461 |
| C | 4.569766  | 0.725555  | -2.574526 |
| H | 4.263387  | 1.727037  | -2.287328 |
| C | 4.595723  | 1.617348  | 0.560567  |
| C | 5.370266  | -0.810277 | -4.262349 |
| H | 5.685182  | -1.002971 | -5.284316 |
| C | 5.916879  | 1.995216  | 0.263894  |
| H | 6.557060  | 1.342847  | -0.323623 |
| C | 4.954437  | -1.603300 | -2.015172 |
| H | 4.945284  | -2.414945 | -1.294739 |
| C | 3.790452  | -2.421868 | 1.379496  |
| H | 2.797808  | -2.499307 | 0.943194  |
| C | 4.261472  | 3.722600  | 1.709919  |
| H | 3.606351  | 4.399595  | 2.249798  |
| C | 5.541818  | -3.357954 | 2.765044  |
| H | 5.913287  | -4.160701 | 3.396448  |
| C | 5.857864  | -1.194680 | 1.730005  |
| H | 6.472439  | -0.313693 | 1.573275  |
| C | 3.767634  | 2.489163  | 1.281823  |
| H | 2.734254  | 2.222236  | 1.474175  |
| C | 5.578639  | 4.087323  | 1.428545  |
| H | 5.959484  | 5.048853  | 1.762206  |
| C | 4.975844  | 0.476038  | -3.884687 |
| H | 4.981573  | 1.284677  | -4.609985 |
| C | 4.274136  | -3.452467 | 2.187824  |
| H | 3.651873  | -4.324924 | 2.364761  |
| C | 6.406099  | 3.224416  | 0.703972  |
| H | 7.426924  | 3.513792  | 0.470222  |
| C | 5.357642  | -1.847904 | -3.328718 |
| H | 5.660589  | -2.849400 | -3.620433 |
| C | 6.331654  | -2.227953 | 2.537803  |
| H | 7.313911  | -2.146865 | 2.995114  |
| N | 0.054034  | 0.076142  | -1.838648 |
| C | 0.054239  | 0.158631  | -3.306467 |
| C | 0.705107  | 1.488993  | -3.727345 |

|   |           |           |           |
|---|-----------|-----------|-----------|
| H | 0.186440  | 2.337721  | -3.271682 |
| H | 1.751831  | 1.521553  | -3.409257 |
| H | 0.672097  | 1.596217  | -4.819117 |
| C | -1.402441 | 0.104262  | -3.803922 |
| H | -1.985319 | 0.933373  | -3.390906 |
| H | -1.432996 | 0.170256  | -4.898752 |
| H | -1.878419 | -0.835197 | -3.504093 |
| C | 0.851132  | -1.032579 | -3.868482 |
| H | 0.868879  | -0.989962 | -4.965117 |
| H | 1.883192  | -1.012680 | -3.504459 |
| H | 0.400651  | -1.981162 | -3.560992 |



**Table 13S.** Geometry Optimization for  $\text{UO}_2\text{I}_2(\text{OPPh}_3)_2$ .

|   |             |             |             |
|---|-------------|-------------|-------------|
| U | -0.00009100 | 0.00149000  | 0.00004500  |
| I | 0.02719500  | -3.10478100 | -0.02076300 |
| P | -3.85600400 | -0.00755500 | -0.02294800 |
| O | -2.33380000 | -0.00564400 | -0.20941000 |
| C | -4.62367900 | 1.14789400  | -1.19603600 |
| C | -4.32016200 | 0.49077900  | 1.66072100  |
| C | -3.50758900 | 0.07493100  | 2.72889200  |
| H | -2.60358900 | -0.49546300 | 2.54181300  |
| C | -4.52613800 | -1.66693900 | -0.32629200 |
| C | -4.99660400 | 1.18261300  | 4.28275700  |
| H | -5.25669200 | 1.45542200  | 5.30192800  |
| C | -5.69564700 | -2.11470100 | 0.30822800  |
| H | -6.20349200 | -1.48302400 | 1.03141900  |
| C | -5.46704300 | 1.25909900  | 1.91215100  |
| H | -6.08689500 | 1.60359500  | 1.08973100  |
| C | -3.91696500 | 2.31191200  | -1.54109700 |
| H | -2.92624100 | 2.49508700  | -1.13411500 |
| C | -4.36071900 | -3.77606100 | -1.50233600 |
| H | -3.82936400 | -4.42687900 | -2.19015200 |
| C | -5.75053300 | 2.99062800  | -2.96852000 |
| H | -6.18736600 | 3.70562400  | -3.66055800 |
| C | -5.89199400 | 0.90821600  | -1.74707100 |
| H | -6.43281200 | -0.00152300 | -1.50318800 |
| C | -3.85633500 | -2.50420500 | -1.23203600 |
| H | -2.93493700 | -2.17463700 | -1.70036700 |
| C | -5.53135500 | -4.21423300 | -0.87978900 |
| H | -5.91867500 | -5.20731300 | -1.09082800 |
| C | -3.84902600 | 0.42562100  | 4.03456100  |
| H | -3.21206300 | 0.11184300  | 4.85626700  |
| C | -4.48438400 | 3.22676500  | -2.42784500 |
| H | -3.93109800 | 4.12165700  | -2.69713900 |
| C | -6.19823700 | -3.38479100 | 0.02495000  |
| H | -7.10134700 | -3.72999000 | 0.52041300  |
| C | -5.80464300 | 1.59875000  | 3.22288600  |
| H | -6.69098300 | 2.19752400  | 3.41291800  |
| C | -6.45351100 | 1.83247800  | -2.62876500 |
| H | -7.43334500 | 1.64172100  | -3.05763000 |
| I | -0.02692600 | 3.10792600  | 0.02140000  |
| P | 3.85583900  | 0.00659800  | 0.02268200  |
| O | 2.33359100  | 0.00734100  | 0.20893200  |
| C | 4.62219400  | -1.14369700 | 1.20168100  |
| C | 4.31952600  | -0.50091500 | -1.65835100 |
| C | 3.50571100  | -0.09234500 | -2.72838900 |
| H | 2.60086900  | 0.47758900  | -2.54401100 |

|   |             |             |             |
|---|-------------|-------------|-------------|
| C | 4.52784000  | 1.66676400  | 0.31756700  |
| C | 4.99576400  | -1.20627600 | -4.27681400 |
| H | 5.25577900  | -1.48433000 | -5.29458600 |
| C | 5.69719700  | 2.11052600  | -0.32006600 |
| H | 6.20392200  | 1.47505200  | -1.04070300 |
| C | 5.46745300  | -1.26887000 | -1.90605900 |
| H | 6.08817700  | -1.60794700 | -1.08202900 |
| C | 3.91540300  | -2.30637900 | 1.55111200  |
| H | 2.92530000  | -2.49206900 | 1.14373300  |
| C | 4.36508900  | 3.78168900  | 1.48356200  |
| H | 3.83478600  | 4.43622600  | 2.16865400  |
| C | 5.74756500  | -2.97818700 | 2.98368700  |
| H | 6.18376900  | -3.68997600 | 3.67941900  |
| C | 5.88984100  | -0.90127700 | 1.75306700  |
| H | 6.43067900  | 0.00749800  | 1.50569000  |
| C | 3.85945400  | 2.50895700  | 1.21978400  |
| H | 2.93810300  | 2.18247700  | 1.69035300  |
| C | 5.53556200  | 4.21590700  | 0.85796200  |
| H | 5.92386100  | 5.20967600  | 1.06390200  |
| C | 3.84709800  | -0.44975800 | -4.03224800 |
| H | 3.20924600  | -0.14160200 | -4.85539200 |
| C | 4.48210700  | -3.21707200 | 2.44259300  |
| H | 3.92881400  | -4.11095100 | 2.71522800  |
| C | 6.20101700  | 3.38157000  | -0.04332800 |
| H | 7.10398300  | 3.72365700  | -0.54120700 |
| C | 5.80495600  | -1.61528900 | -3.21504900 |
| H | 6.69211300  | -2.21376500 | -3.40218300 |
| C | 6.45063600  | -1.82141500 | 2.63953000  |
| H | 7.42994500  | -1.62847500 | 3.06861200  |
| O | -0.16887400 | -0.01951600 | 1.76577400  |
| O | 0.16872000  | 0.02253800  | -1.76573600 |

**Table 14S.** Comparison of selected experimental and theoretical U-X (X = halide) metrical parameters in complexes  $\text{UO}_2^{2+}$  complexes.

| Optimized Geometry     |       |       |       |       | Experimental Geometry |       |                    |        |
|------------------------|-------|-------|-------|-------|-----------------------|-------|--------------------|--------|
|                        | F     | Cl    | Br    | I     | F                     | Cl    | Br                 | I      |
| U=O                    | 1.792 | 1.776 | 1.775 | 1.773 | 1.772 <sup>a</sup>    | 1.764 | 1.766 <sup>b</sup> | 1.760  |
| U-X                    | 2.168 | 2.693 | 2.889 | 3.106 | 2.338 <sup>a</sup>    | 2.645 | 2.839 <sup>b</sup> | 3.0476 |
| U-O(PPh <sub>3</sub> ) | 2.405 | 2.352 | 2.341 | 2.343 | 2.375 <sup>a</sup>    | 2.300 | 2.249 <sup>b</sup> | 2.298  |

<sup>a</sup> values obtained from  $[\{\text{UO}_2(\mu\text{-F})(\text{OPPh}_3)_3\}_2][\text{BF}_4]_2$

<sup>b</sup> values obtained from  $\text{UO}_2\text{Br}_2(\text{OAsPh}_3)_2$

**Table 15S.** Comparison of selected experimental and theoretical U-X (X = halide) metrical parameters in complexes  $\text{U}(\text{N}^t\text{Bu})_2^{2+}$  complexes.

| Optimized Geometry     |       |       |       |       | Experimental Geometry |       |       |        |
|------------------------|-------|-------|-------|-------|-----------------------|-------|-------|--------|
|                        | F     | Cl    | Br    | I     | F                     | Cl    | Br    | I      |
| U=N                    | 1.877 | 1.84  | 1.843 | 1.839 | <sup>c</sup>          | 1.848 | 1.828 | 1.840  |
| U-X                    | 2.197 | 2.752 | 2.938 | 3.174 | <sup>c</sup>          | 2.747 | 2.867 | 3.0880 |
| U-O(PPh <sub>3</sub> ) | 2.442 | 2.417 | 2.402 | 2.400 | <sup>c</sup>          | 2.344 | 2.335 | 2.338  |

<sup>c</sup> experimental structure was not determined
